# Supplementary material for: Synthesis of glycidyl azide polymers (GAPs) via binary ionic liquid–water mixtures without catalysts
Source: Royal Society of Chemistry journal article supplement (doi:10.1039/c5gc02854j), 2016-01-01
Supplement: c5gc02854j1.pdf [file c5gc02854j1.pdf]

# Synthesis of glycidyl azide polymers (GAPs) via binary ionic liquid–water mixtures without catalysts

Xiaodong Xu,<sup>a,b</sup> Meihua Liu, <sup>\*a</sup> Yuan Yin, <sup>a</sup> Chunbai Zheng, <sup>\*a</sup> Pengyang Deng<sup>a</sup> and Dongfeng Xue<sup>a</sup>

<sup>a</sup> Polymer Composites Engineering Laboratory, Changchun Institute of Applied Chemistry, Chinese Academy of Sciences, Changchun 130022, China. E-mail: zhengcb@ciac.ac.cn; Fax: +86-431-85262329; Tel: +86-431- 85262716.

<sup>b</sup> University of Chinese Academy of Sciences, Beijing10039, China.

## Supporting Information

**General Methods:** The GAP synthesis was carried out in a 250 ml three-necked round bottom flask equipped with a thermometer, a reflux condenser, and a mechanical stirrer. The 30.00 g of PECH was dissolved in mixed solvents with a different mass ratio of [Bmim]Cl and distilled water and stirred. The solution was heated to 95°C in an oil bath, and then 21.09 g of sodium azide was rapidly added into the reaction mixture with continued stirring for 10 h at this temperature. The reaction was monitored with quantitative <sup>13</sup>C-NMR. After the reaction finished, the mixtures were washed sequentially with distilled water more than 3 times until all salts were removed. The water was then evaporated to recover the products.

**Table 1.**

| Entry | [bmim][Cl]/<br>H <sub>2</sub> O <sup>a</sup> | PECH<br>g | NaN <sub>3</sub><br>g | Time<br>h | T<br>°C | Yield <sup>b</sup><br>% |
|-------|----------------------------------------------|-----------|-----------------------|-----------|---------|-------------------------|
| 1     | 4:1                                          | 30        | 21.09                 | 10        | 95      | 89.17                   |
| 2     | 5:1                                          | 30        | 21.09                 | 10        | 95      | 56.52                   |
| 3     | 100:0                                        | 30        | 21.09                 | 10        | 95      | 50                      |
| 4     | 1:1                                          | 30        | 21.09                 | 10        | 95      | 45.7                    |
| 5     | 2:3                                          | 30        | 21.09                 | 10        | 95      | 37.5                    |
| 6     | 1:4                                          | 30        | 21.09                 | 10        | 95      | 24.82                   |
| 7     | 0:100                                        | 30        | 21.09                 | 10        | 95      | 0                       |

<sup>a</sup> mass ratio

<sup>b</sup> Isolated yields

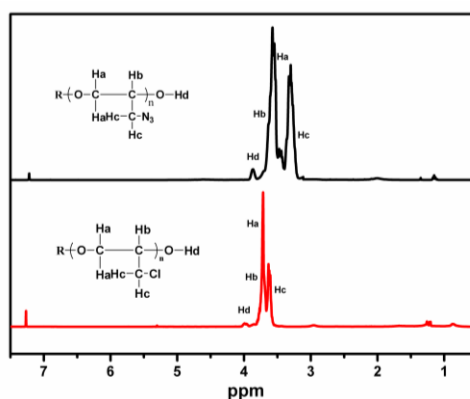

Fig.1. <sup>1</sup>H-NMR spectra of GAP<sup>1</sup> and PECH.

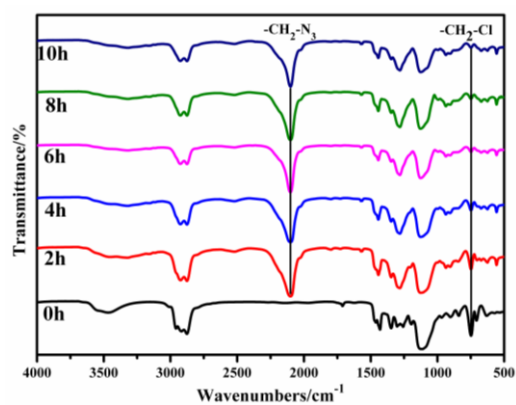

Fig.2. IR spectra of GAP1.

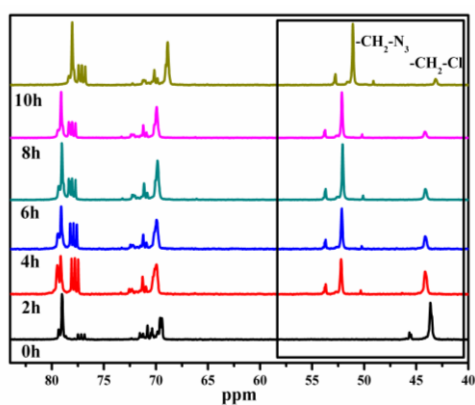

Fig.3.  $^{13}\text{C}$ -NMR spectra of GAP1.

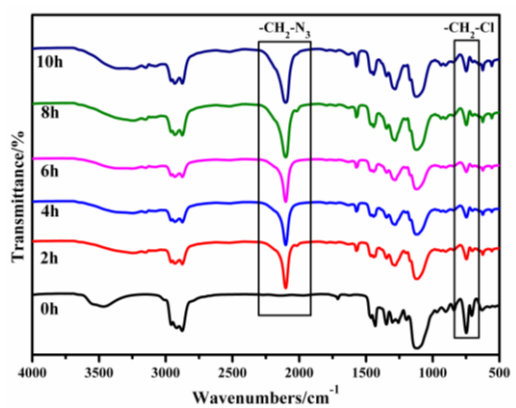

Fig.4. IR spectra of GAP2.

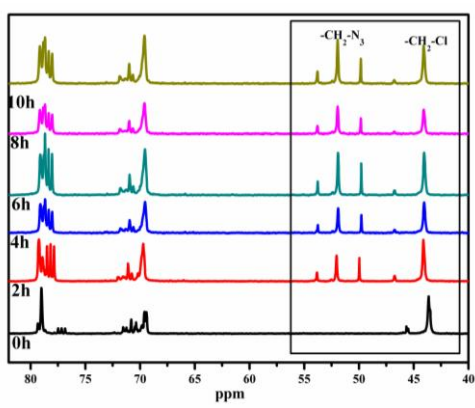

Fig.5.  $^{13}\text{C}$ -NMR spectra of GAP2.

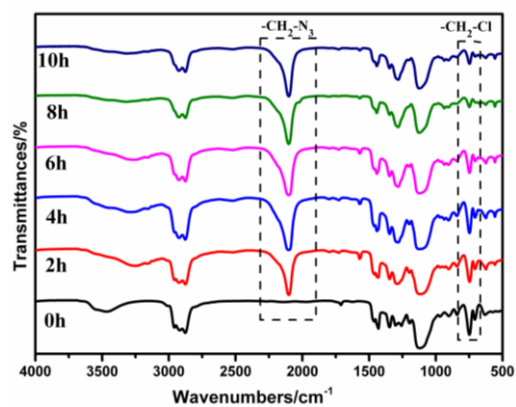

Fig.6. IR spectra of GAP3.

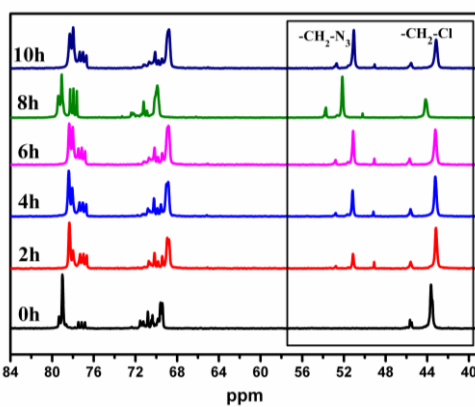

Fig.7.  $^{13}\text{C}$ -NMR spectra of GAP3.

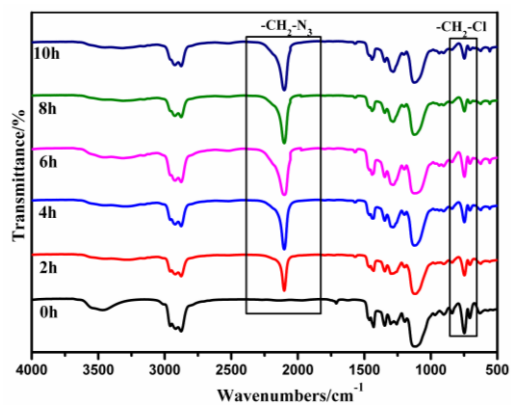

Fig.8. IR spectra of GAP4.

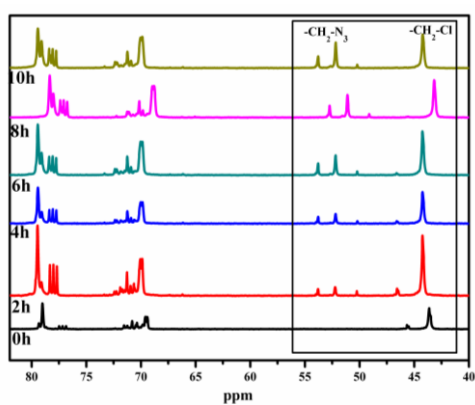

Fig.9.  $^{13}\text{C}$ -NMR spectra of GAP4.

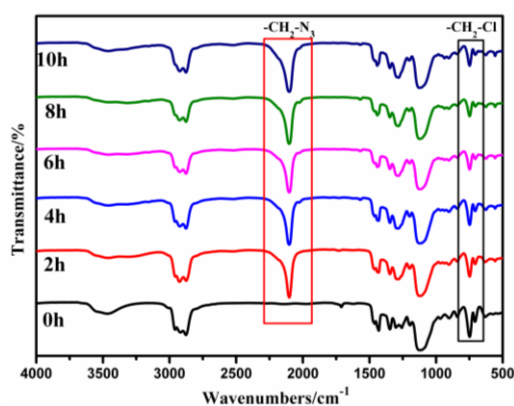

Fig.10. IR spectra of GAP5.

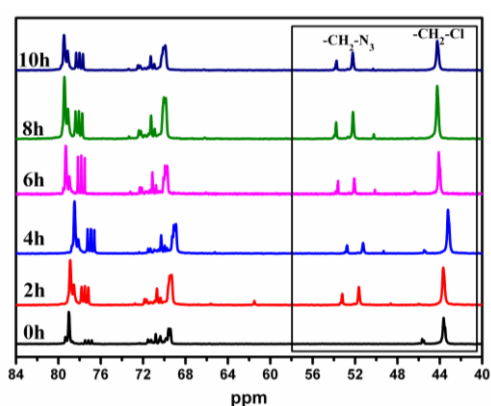

Fig.11.  $^{13}\text{C}$ -NMR spectra of GAP5.

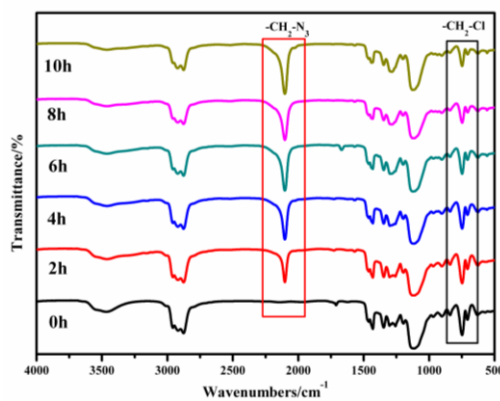

Fig.12. IR spectra of GAP6.

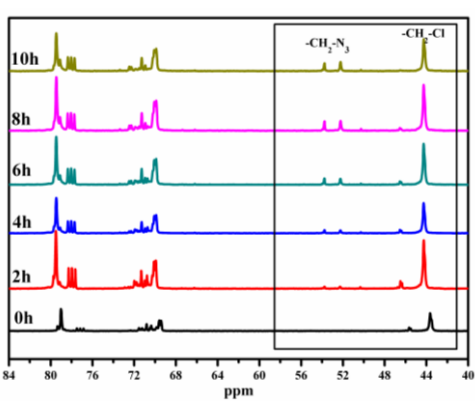

Fig.13.  $^{13}\text{C}$ -NMR spectra of GAP6.

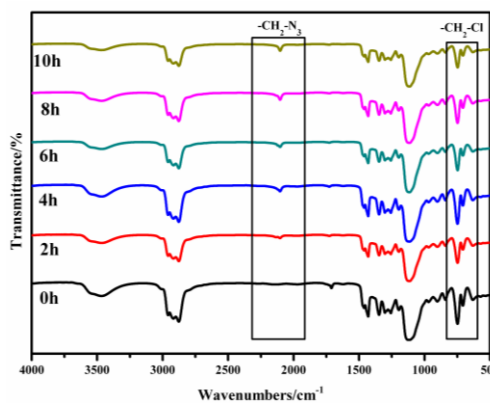

Fig.14. IR spectra of GAP7.

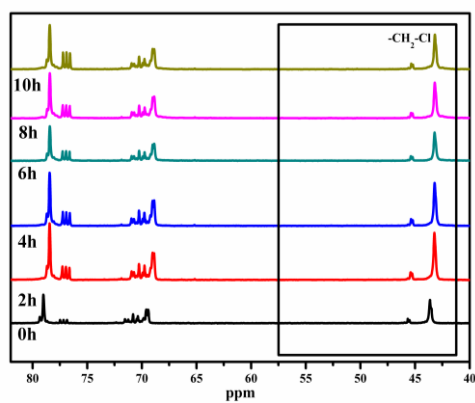

Fig.15.  $^{13}\text{C}$ -NMR spectra of GAP7.

[1] Joshua Aronson, *Georgia Insitute of Technology*, 2009.

[2] Y.V. Nacharaiah, A.J. Francis, *Chemosphere*, 2015,**128**, 178.

[3] B. G. Kim, E. H. Sohn, J. S. Chung, S. Y. Kwak and J. C. Lee, *J Appl Polym Sci*, 2009, **114**, 132.
